# Supplementary figures and images for: Central inhibition of granulocyte-macrophage colony-stimulating factor is analgesic in experimental neuropathic pain
Source: PubMed Central journal article supplement — Pain. 2018 Jan 16;159(3):550–9. doi: 10.1097/j.pain.0000000000001130 (PMC5828377; doi:10.1097/j.pain.0000000000001130), 2018-01-16

### A. Subcutaneous CAM3003

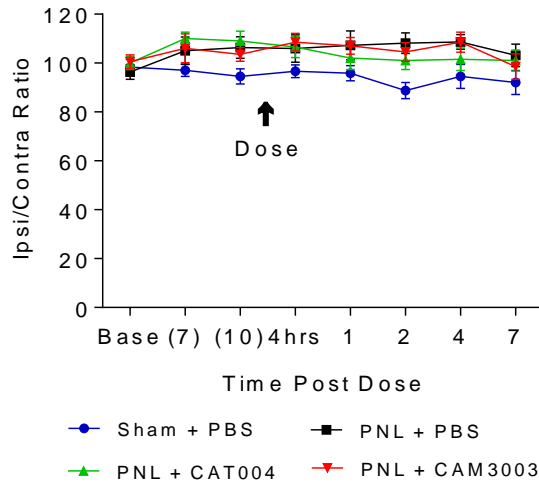

### B. Intrathecal CAM3003

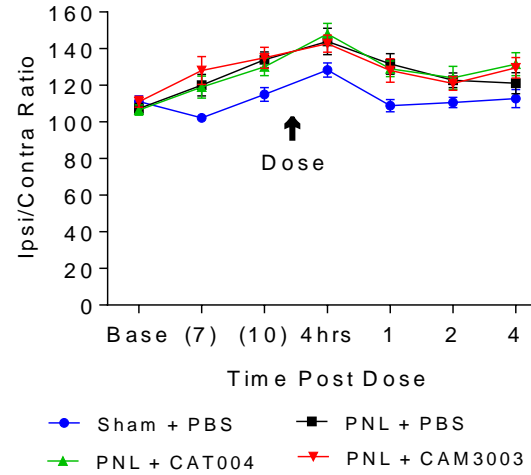

### C. Subcutaneous Bbbt-CAM3003

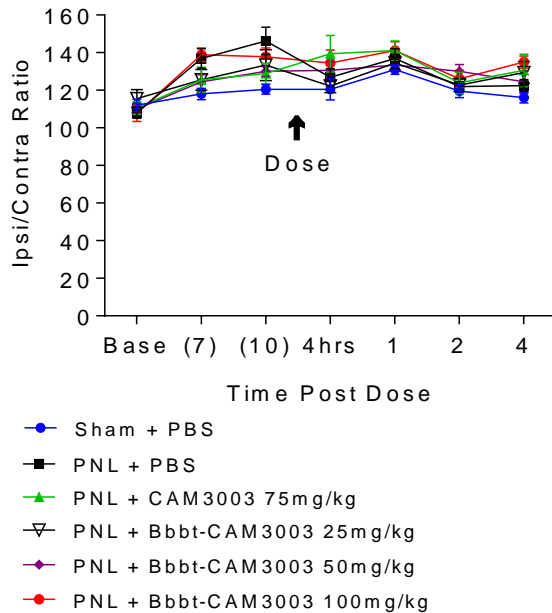

### D. GM-CSF- $\beta$ -chain WT vs KO

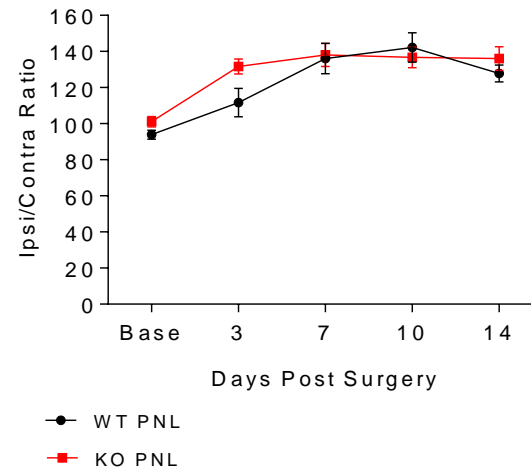

Supplement: jop-159-550-s001.pdf [file jop-159-550-s001.pdf]

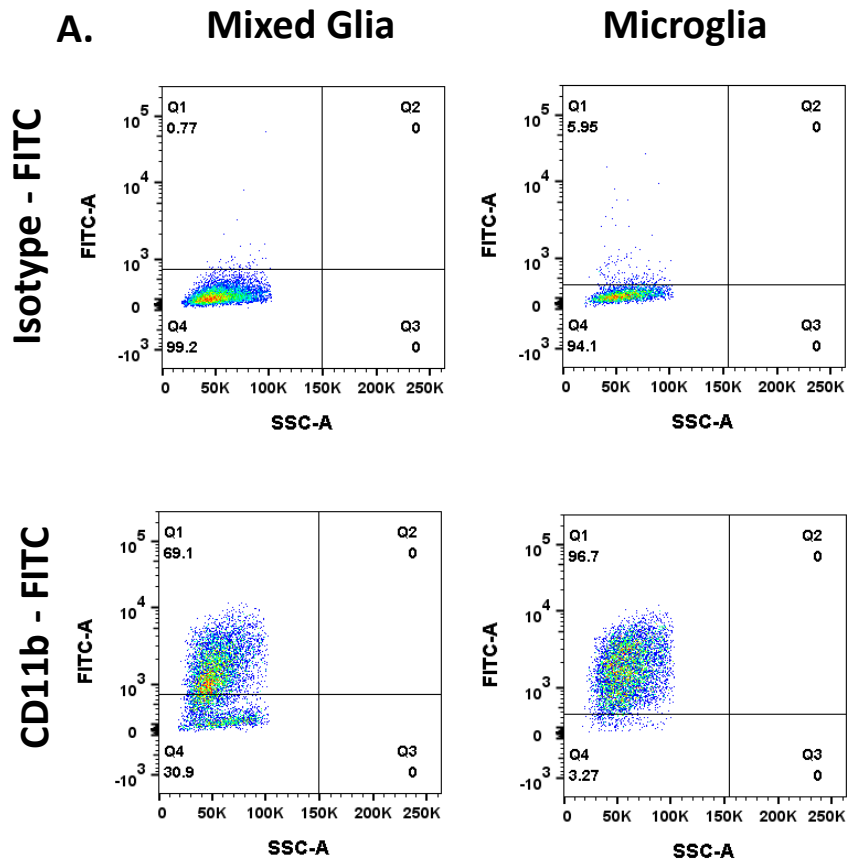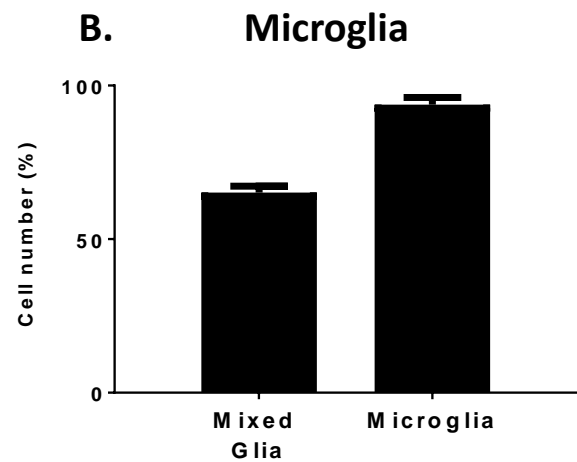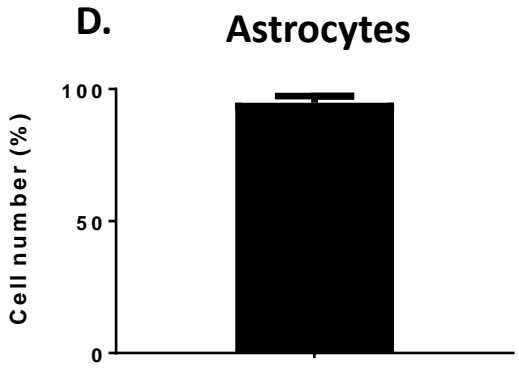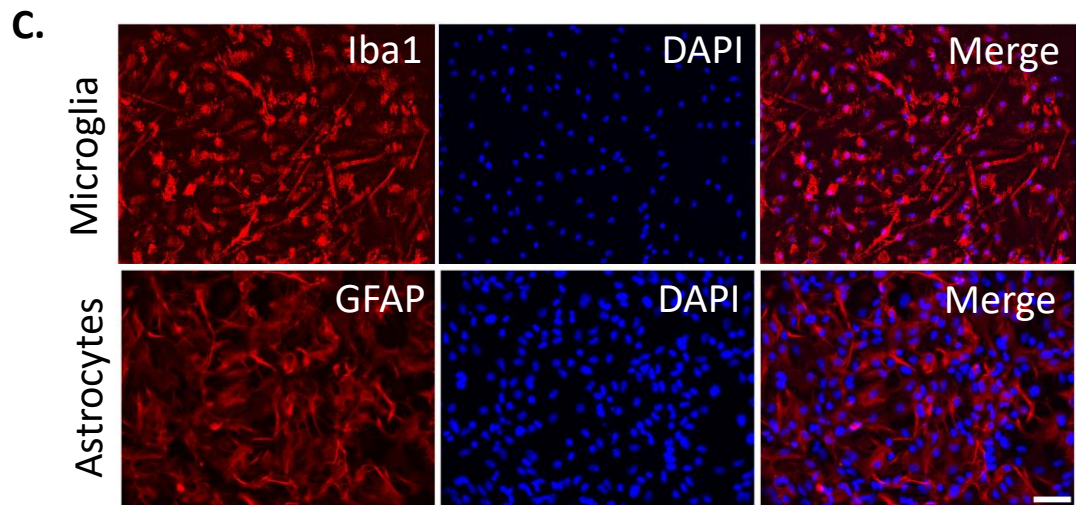

Supplement: jop-159-550-s002.pdf [file jop-159-550-s002.pdf]
